# Supplementary material for: Health Entrepreneurship in Universal Health Coverage Delivery: Evidence from Emerging Economies
Source: Research Square preprint supplement (doi:10.21203/rs.3.rs-5453580/v1), 2025-04-25
Supplement: Supplementary file 1 [file ae0d2b5f54196f4ab2f93f64.docx]

**QUESTIONNAIRE**

Please indicate your answer by ticking (X) or (√) in the appropriate box. This questionnaire is strictly for research purposes only.

**Section A: General Information**

This section asks for your background information. Please indicate your answer by ticking (X) or (√) in the appropriate box.

1. Age:
2. 18-25 ❑
3. 26-35 ❑
4. 36-45 ❑
5. Above 45 ❑
6. Gender:

i. Male❑

ii. Female❑

1. Other❑
2. Number of Years in Healthcare Entrepreneurship:
3. Less than 1 year ❑
4. 1-3 years❑
5. 4-6 years❑
6. 7-10 years❑
7. More than 10 years❑
8. Type of Healthcare Service Provided:
9. Drug dispensation ❑
10. Home-based care ❑
11. Curative Out-patient care❑
12. Curative In-patient care ❑
13. Laboratory and diagnostic services ❑
14. Medical equipment sales ❑
15. End-of-life care ❑
16. Preventive Care ❑
17. Rehabilitative Care ❑
18. Other ❑ ………………………………………………………………………………. (*Specify*)

5. Is your enterprise accredited by either private or social health insurance programs?

Yes ❑ No ❑

**Section B: Access to Healthcare Services**

Please indicate your level of agreement with the under-listed statements by choosing from a scale of 1 (strongly disagree) to 5 (strongly agree). (1-strongly disagree, 2-disagree, 3- Neutral, 4-agree and 5-strongly agree).

| **ACC** |  | 1 | 2 | 3 | 4 | 5 |
| --- | --- | --- | --- | --- | --- | --- |
| **ACC1** | My healthcare enterprise has all essential health commodities and equipment. |  |  |  |  |  |
| **ACC2** | My enterprise has significantly reduced the geographical barriers to accessing healthcare services. |  |  |  |  |  |
| **ACC3** | My facility is near my target population; they stay within a 5 km radius of the facility. |  |  |  |  |  |
| **ACC4** | Most of my clients incur transport costs to access services from our enterprise. |  |  |  |  |  |
| **ACC5** | My enterprise adopts innovative approaches to delivering healthcare services, such as mobile-based applications, to reach clients. |  |  |  |  |  |
| **ACC6** | The services I offer are acceptable in my target society per societal and cultural norms. |  |  |  |  |  |
| **ACC7** | There is a sufficient skilled workforce for my healthcare enterprise. |  |  |  |  |  |

**Section C: Affordability of Healthcare Services**

Please indicate your level of agreement with the under-listed statements by choosing from a scale of 1 (strongly disagree) to 5 (strongly agree). (1-strongly disagree, 2-disagree, 3- Neutral, 4-agree and 5-strongly agree)

| **AFF** |  | 1 | 2 | 3 | 4 | 5 |
| --- | --- | --- | --- | --- | --- | --- |
| **AFF1** | My healthcare enterprise offers affordable healthcare services to the community. |  |  |  |  |  |
| **AFF2** | Accreditation with health insurance does not help reduce the overall cost of care for my clients. |  |  |  |  |  |
| **AFF3** | My enterprise provides flexible payment options to ensure affordability for patients/ clients. |  |  |  |  |  |
| **AFF4** | My clients in long-term care or long-term service continually visit my services without defaulting on the grounds of inability to afford them. |  |  |  |  |  |

**Section D: Challenges Faced by Health Entrepreneurs**

Please indicate your level of agreement with the under-listed statements by choosing from a scale of 1 (strongly disagree) to 5 (strongly agree). (1-strongly disagree, 2-disagree, 3- Neutral, 4-agree and 5-strongly agree)

| **CHA** |  | 1 | 2 | 3 | 4 | 5 |
| --- | --- | --- | --- | --- | --- | --- |
| **CHA1** | Regulatory hurdles are a significant challenge for my healthcare enterprise. |  |  |  |  |  |
| **CHA2** | Access to funding is not a significant obstacle for health entrepreneurs. |  |  |  |  |  |
| **CHA3** | Government policies, including taxation, are conducive to health entrepreneurship. |  |  |  |  |  |
| **CHA4** | My target clients/population is receptive to innovative means of service delivery, including technology-based innovations. |  |  |  |  |  |

**Section E: Potential Opportunities for Health Entrepreneurs**

Please indicate your level of agreement with the under-listed statements by choosing from a scale of 1 (strongly disagree) to 5 (strongly agree). (1-strongly disagree, 2-disagree, 3- Neutral, 4-agree and 5-strongly agree).

| **OPP** |  | 1 | 2 | 3 | 4 | 5 |
| --- | --- | --- | --- | --- | --- | --- |
| **OPP1** | There are significant growth opportunities for health entrepreneurs in my country. |  |  |  |  |  |
| **OPP2** | The adoption of innovative technologies presents new opportunities for my healthcare enterprise. |  |  |  |  |  |
| **OPP3** | Partnerships with other healthcare providers can enhance the services offered by my enterprise. |  |  |  |  |  |
| **OPP4** | There is no growing demand for healthcare services that my enterprise can fulfil. |  |  |  |  |  |

**Comment (s)**

………………………………………………………………………………………………………………………………………………………………………………………………………………………………………………………………………………………………………………………………………………………………………………………………………………………………………………………………………………………………………………………………………
